# Supplementary material for: Bioinspired Synthesis of Magnetic Nanoparticles Based on Iron Oxides Using Orange Waste and Their Application as Photo-Activated Antibacterial Agents
Source: MDPI journal article supplement (doi:10.3390/ijms24054770), 2023-03-01
Supplement: s1 [file s1]

## Bioinspired Synthesis of Magnetic Nanoparticles Based on Iron Oxides Using Orange Waste and Their Application as Photo-Activated Antibacterial Agents

David Giancarlo García <sup>1</sup>, Cristina Garzón-Romero <sup>2</sup>, Mateo Alejandro Salazar <sup>2</sup>, Karina J. Lagos <sup>1</sup>, Kleber Orlando Campaña <sup>1</sup>, Alexis Debut <sup>3</sup>, Karla Vizuite <sup>3</sup>, Miryan Rosita Rivera <sup>2</sup>, Dario Niebieskikwiat <sup>4</sup>, Maria J. Benitez <sup>5</sup> and María Paulina Romero <sup>1,\*</sup>

<sup>1</sup> Department of Materials, Escuela Politécnica Nacional (EPN), Quito 170525, Ecuador

<sup>2</sup> Laboratorio de Investigación en Citogenética y Biomoléculas de Anfibios (LICBA), Centro de Investigación para la Salud en América Latina (CISEAL), Facultad de Ciencias Exactas y Naturales, Pontificia Universidad Católica del Ecuador (PUCE), Quito 170143, Ecuador

<sup>3</sup> Centro de Nanociencia y Nanotecnología, Universidad de Las Fuerzas Armadas ESPE, Sangolquí 171103, Ecuador

<sup>4</sup> Departamento de Física, Colegio de Ciencias e Ingenierías, Universidad San Francisco de Quito, Quito 170901, Ecuador

<sup>5</sup> Departamento de Física, Escuela Politécnica Nacional (EPN), Quito 170525, Ecuador

\* Correspondence: maria.romerom@epn.edu.ec

### Supplementary Figures

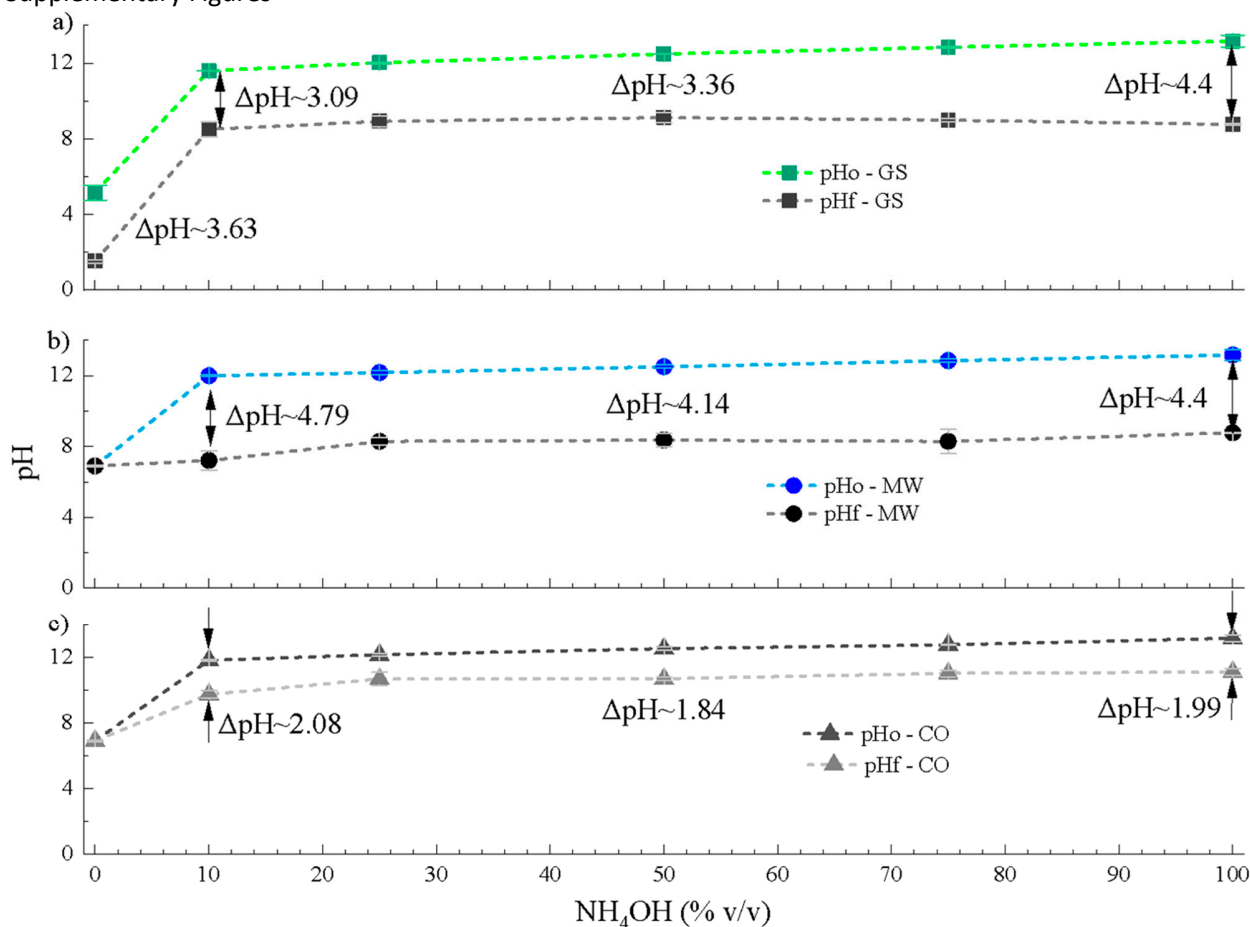

**Figure S1.** Initial and final pH measured in: a) green synthesis, b) microwave synthesis, and c) coprecipitation synthesis.

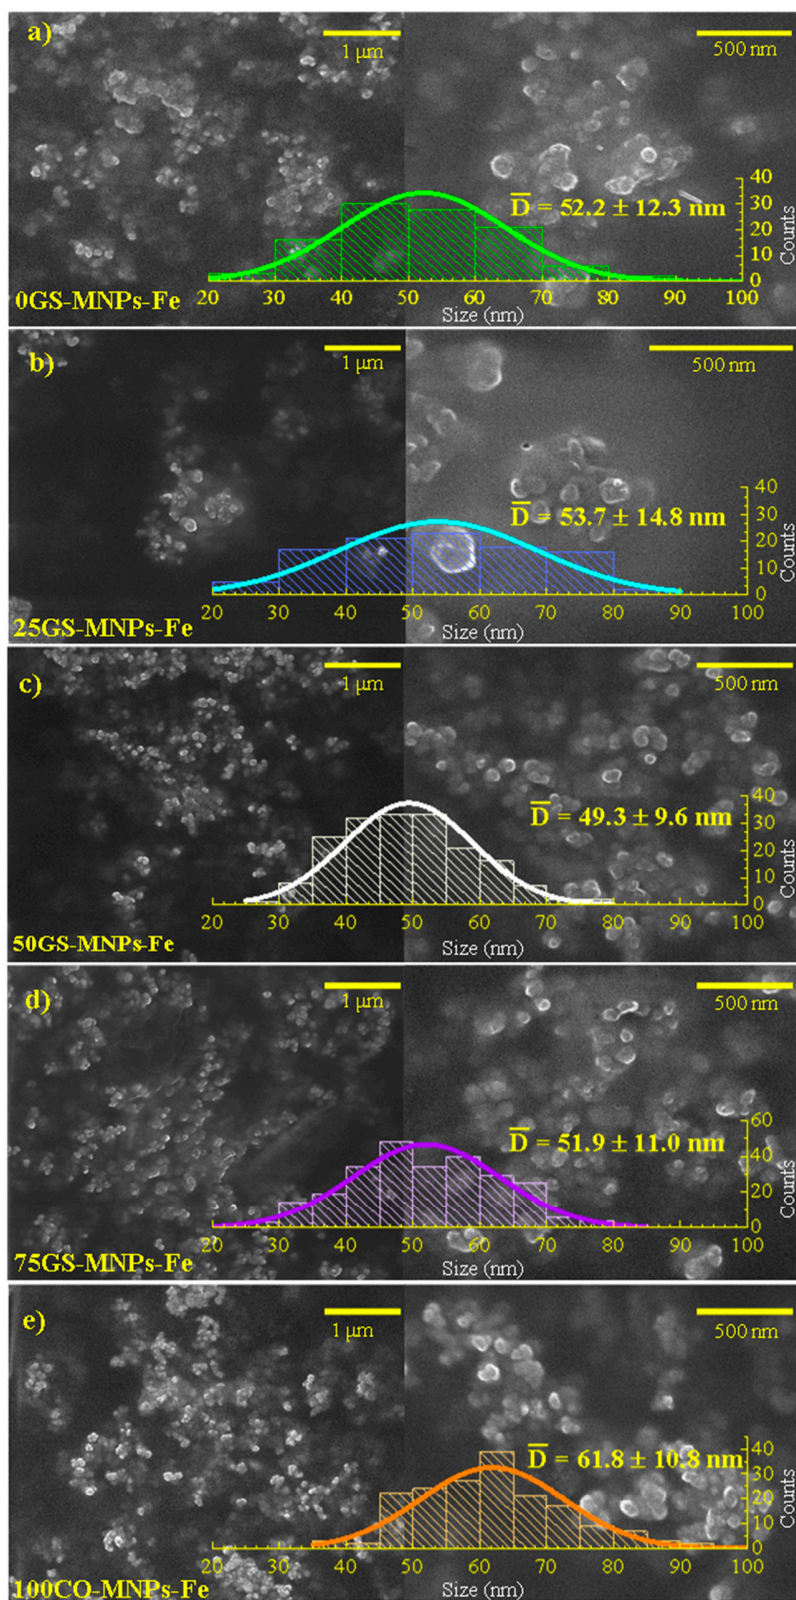

**Figure S2.** SEM images of the samples a) 0GS-MNPs-Fe, b) 25GS-MNPs-Fe, c) 50GS-MNPs-Fe, d) 75GS-MNPs-Fe and e) 100CO-MNPs-Fe. Filters used: Smooth, Gaussian blur (sigma radius: 1.0) and Median (Radius 0.8 pixels).

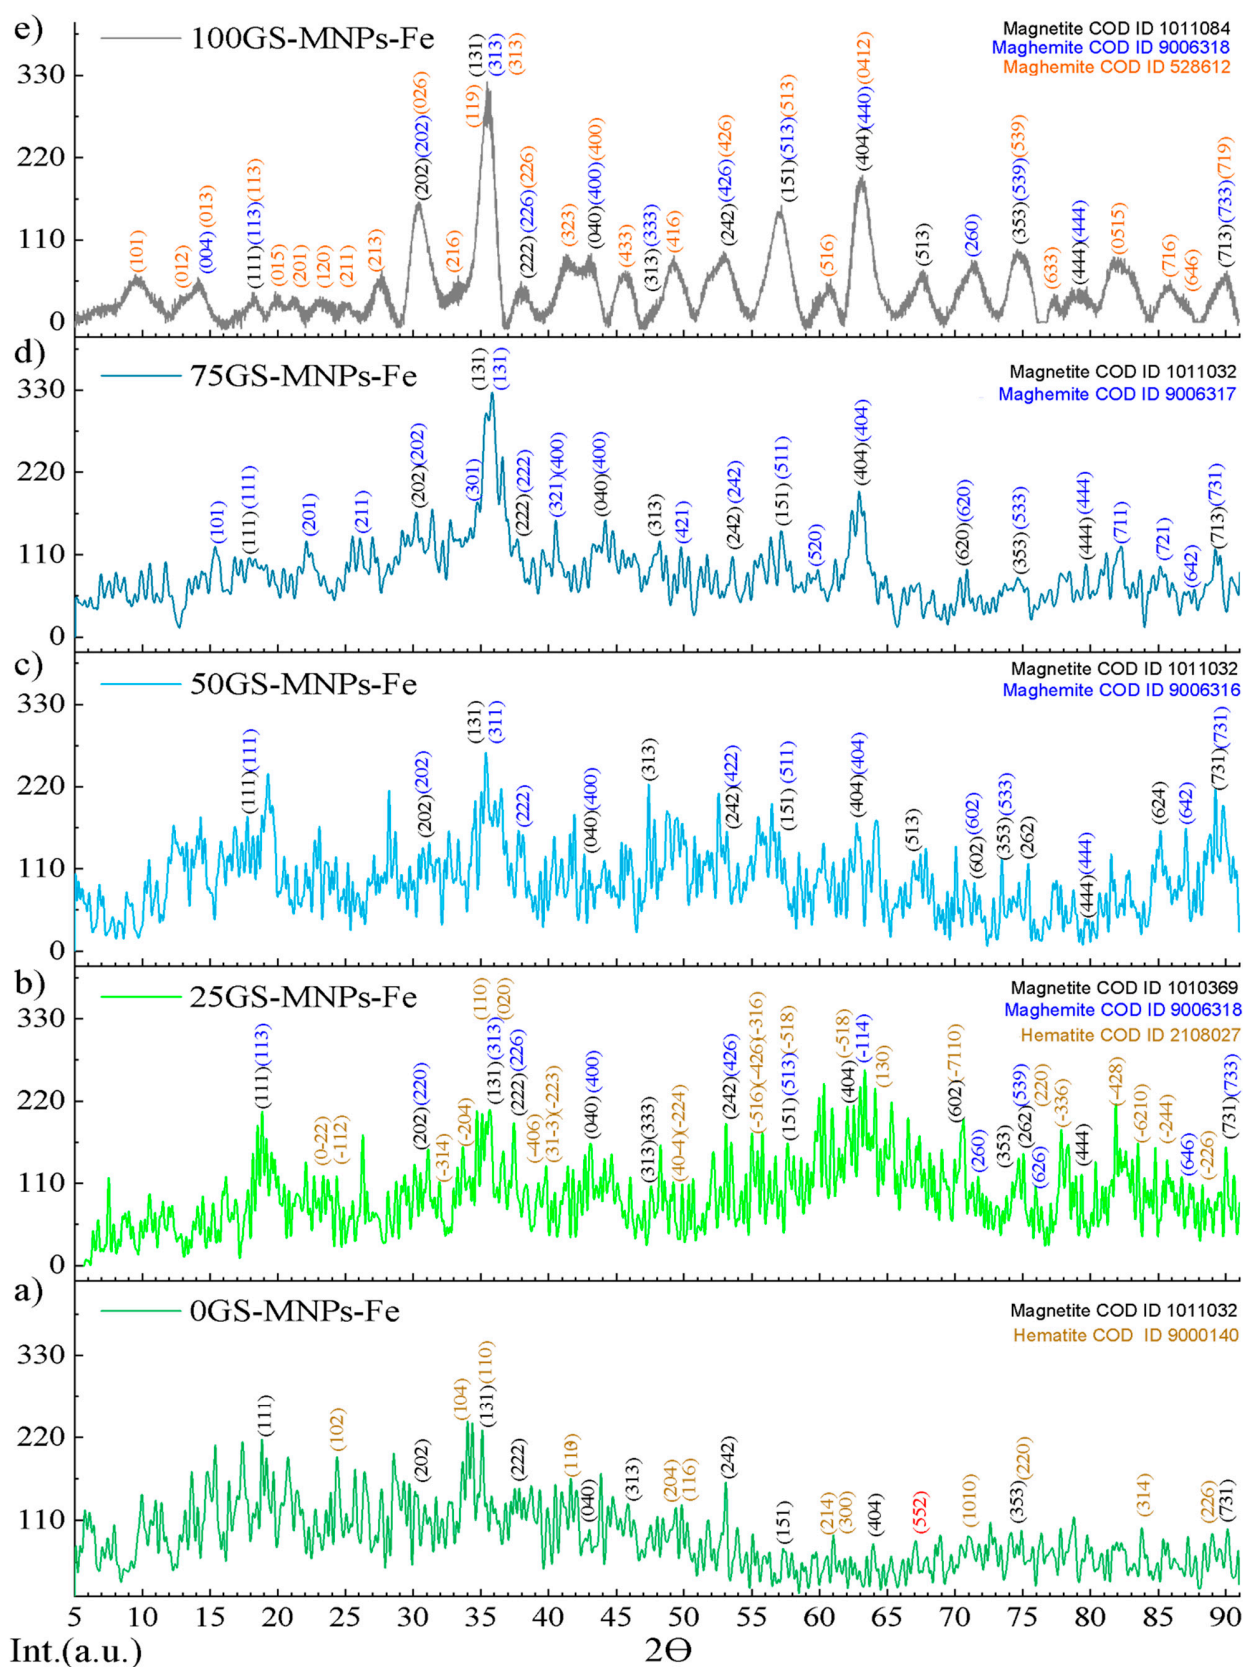

**Figure S3a.** Indexed XRD patterns of the samples; a) 0GS-MNPs-Fe, b) 25GS-MNPs-Fe, c) 50GS-MNPs-Fe, d) 75GS-MNPs-Fe and e) 100GS-MNPs-Fe.



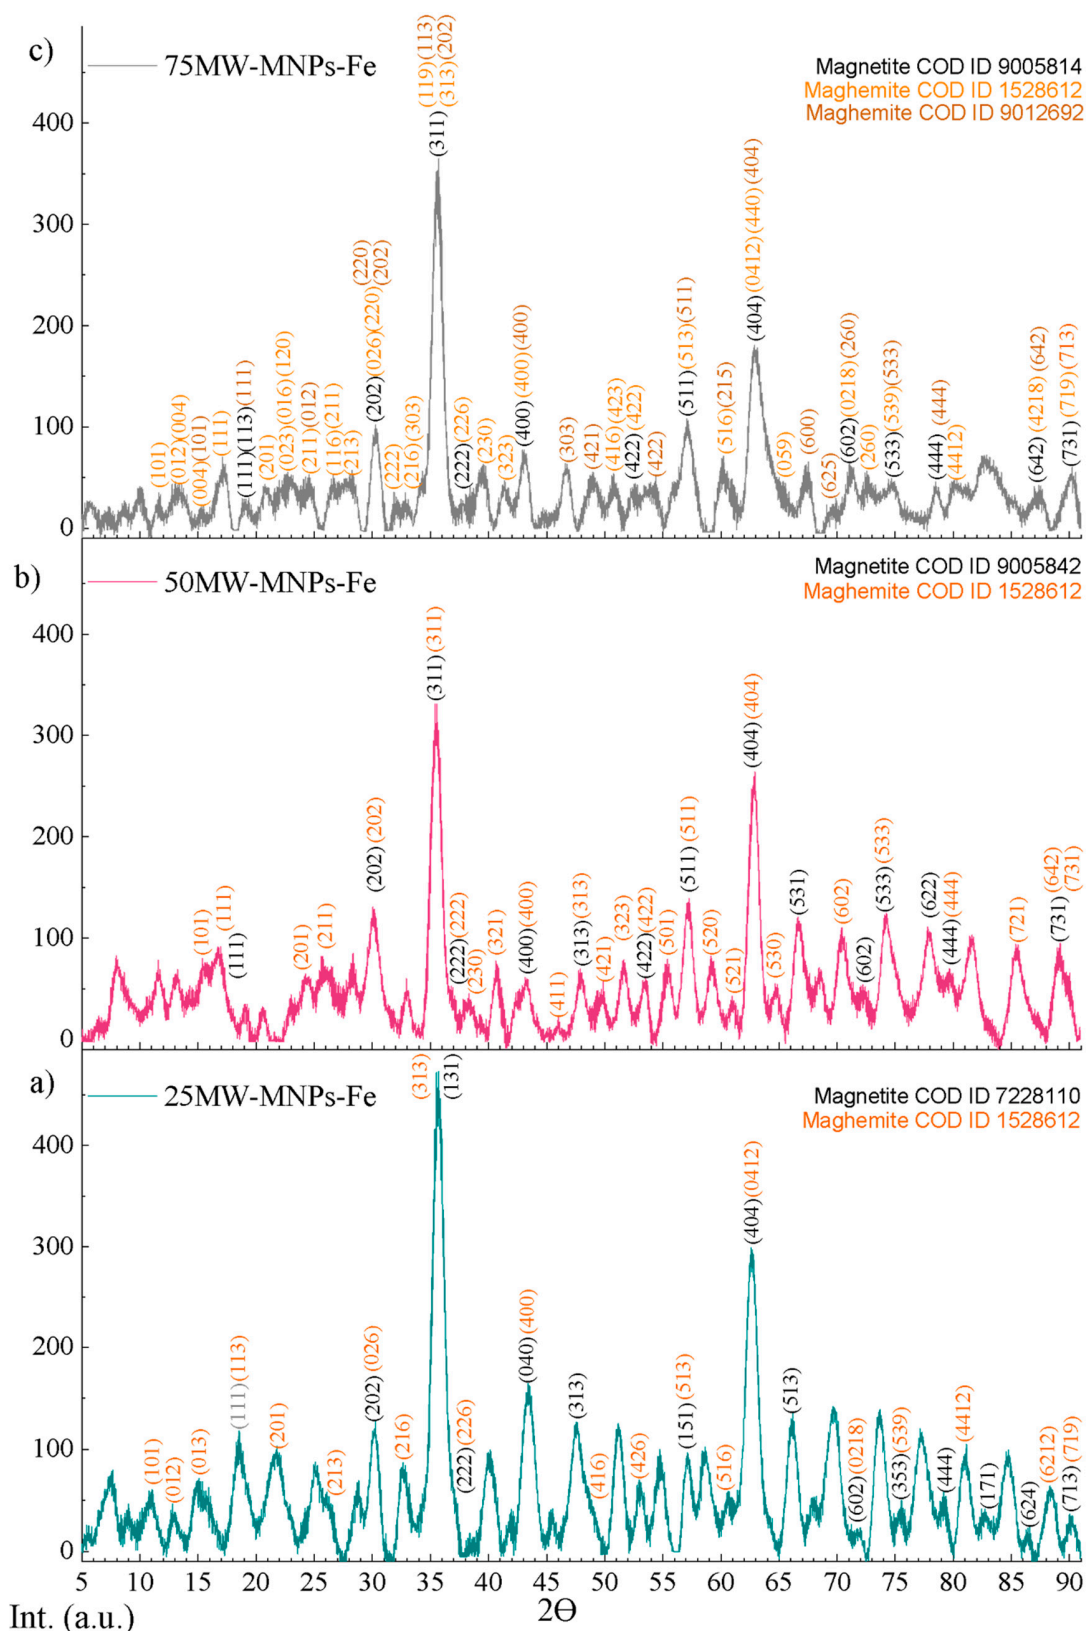

**Figure S3b.** Indexed XRD patterns of the samples: a) 25MW-MNPs-Fe, b) 50MW-MNPs-Fe and c) 75MW-MNPs-Fe.

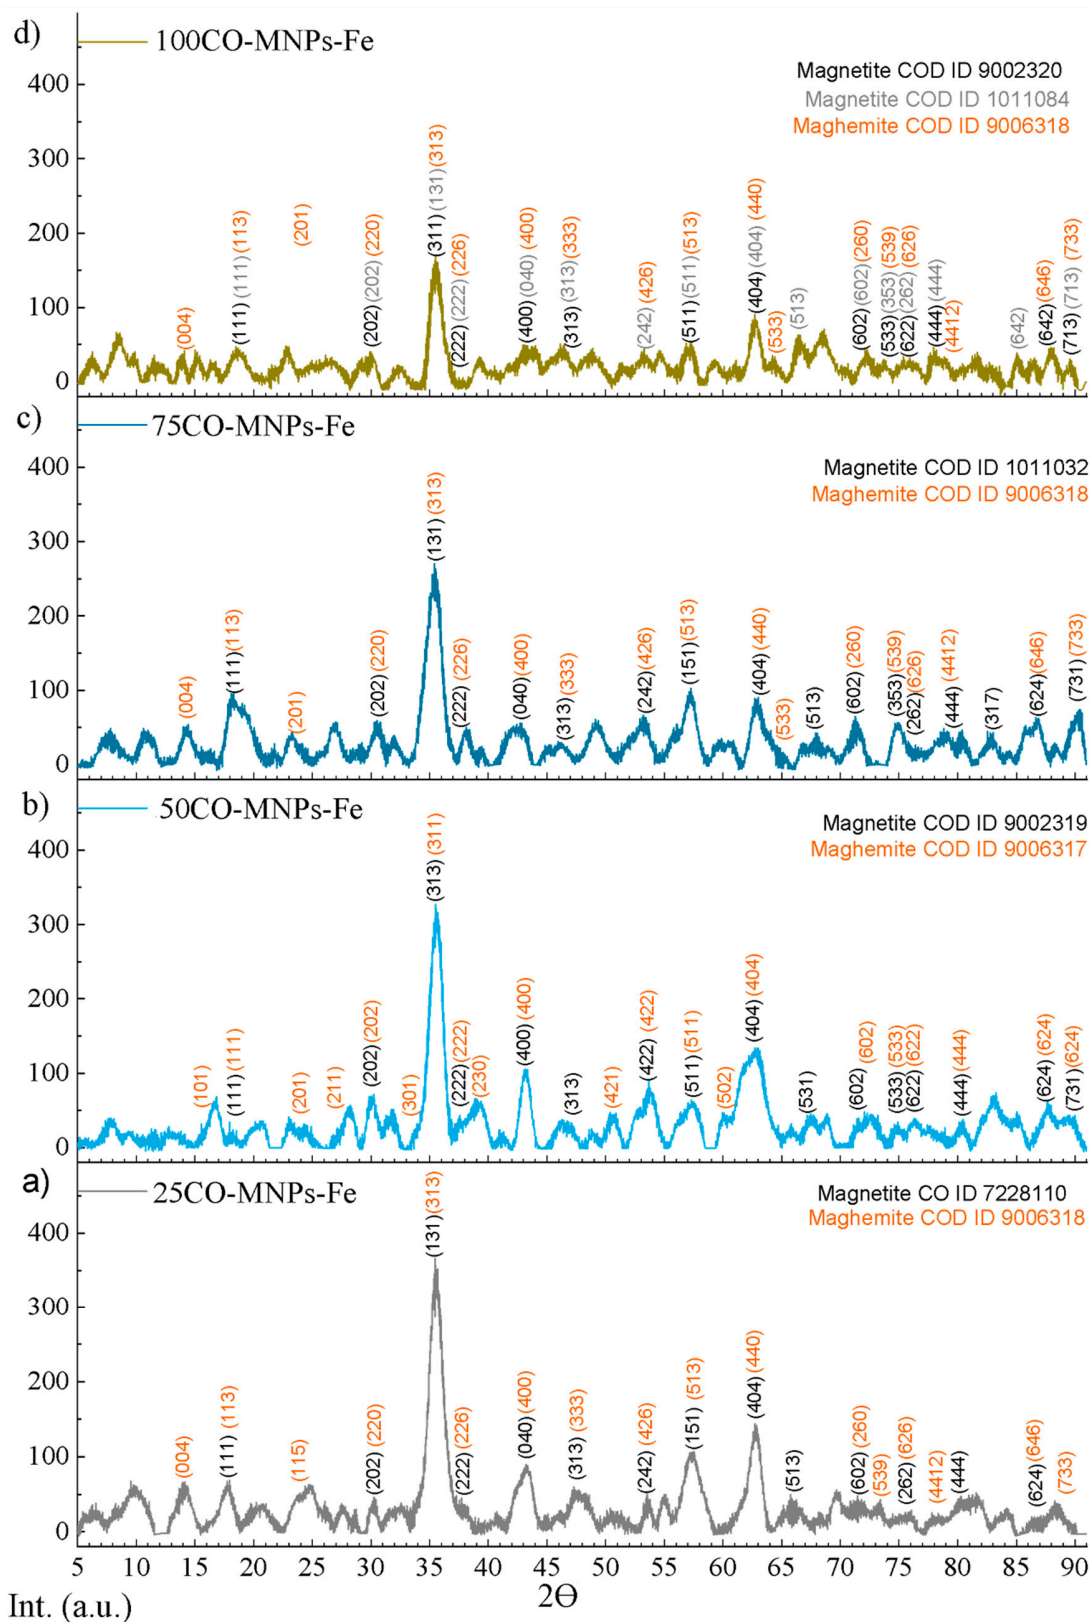

**Figure S3c.** Indexed XRD patterns of the samples: a) 25CO-MNPs-Fe, b) 50CO-MNPs-Fe, c) 75CO-MNPs-Fe and d) 100CO-MNPs-Fe.

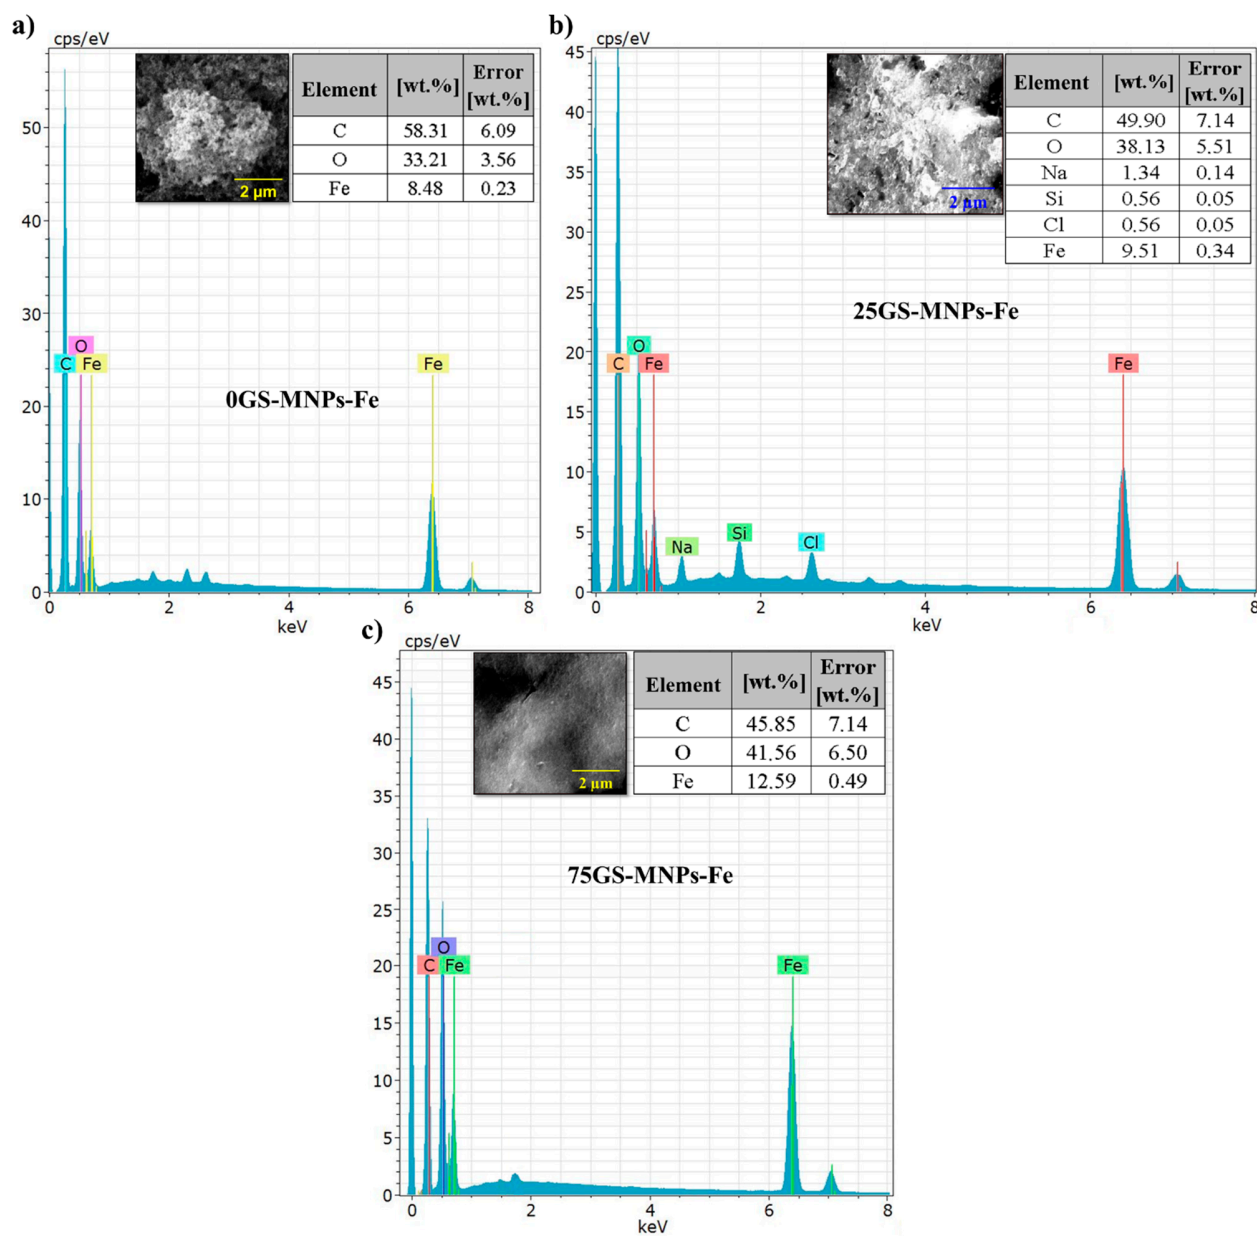

**Figure S4.** EDS data of the samples a) 0GS-MNPs-Fe, b) 25GS-MNPs-Fe, and c) 75GS-MNPs-Fe.

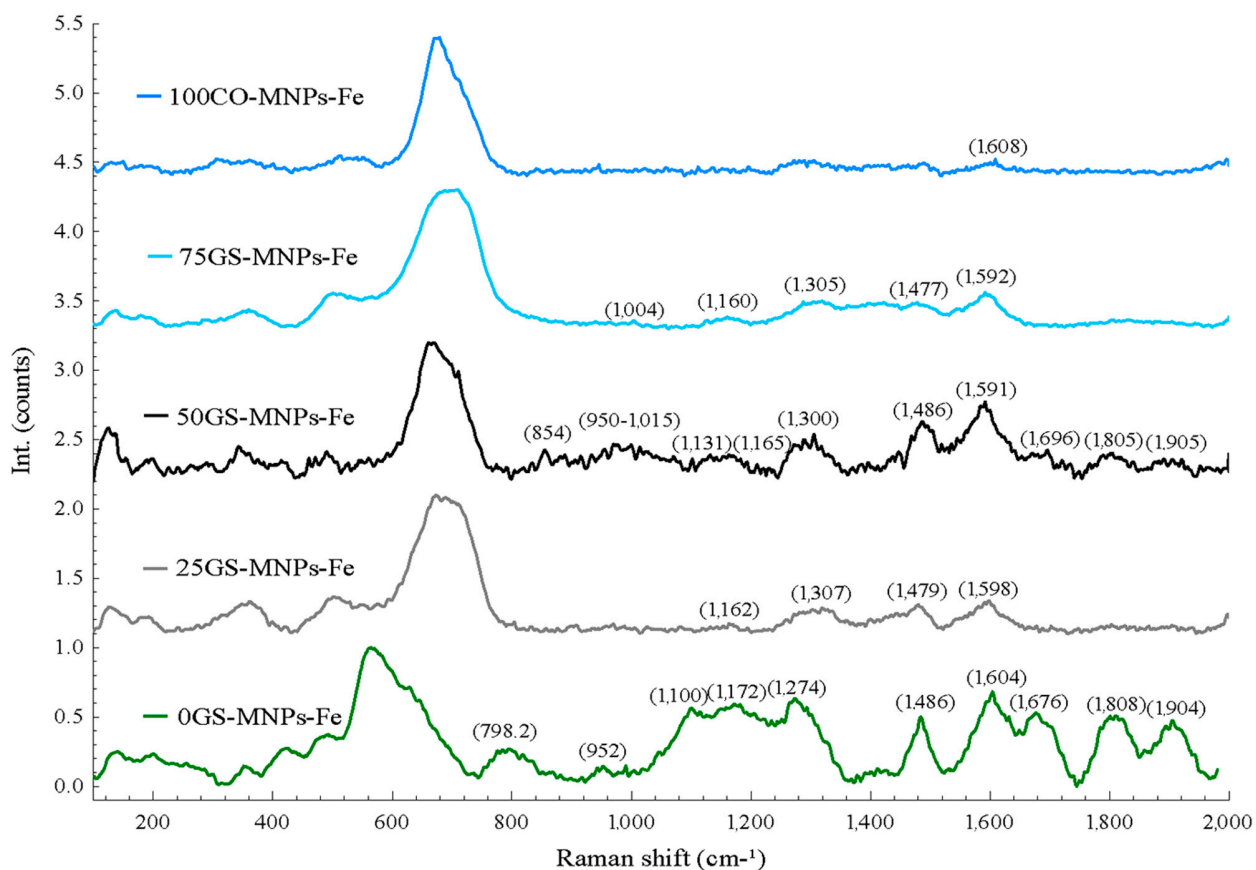

**Figure S5.** Full Raman spectra (100-2000 cm<sup>-1</sup>) of the samples: 100CO-MNPs-Fe, 75GS-MNPs-Fe, 50GS-MNPs-Fe, 25GS-MNPs-Fe and 0GS-MNPs-Fe.

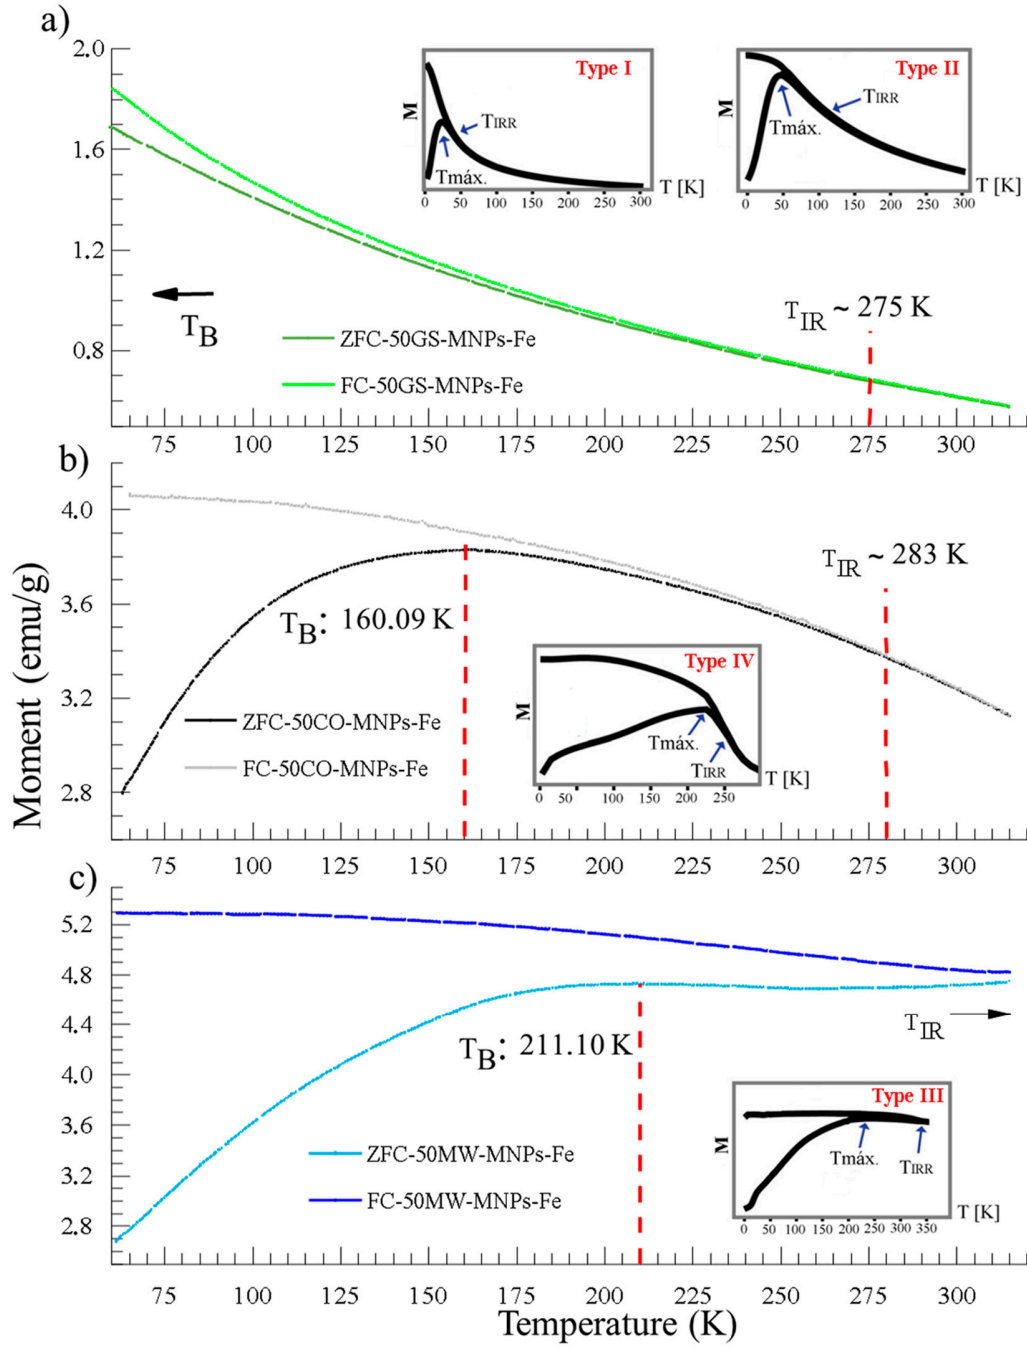

**Figure S6.** ZFC/FC curve of the samples a) 50GS-MNPs-Fe, b) 50CO-MNPs-Fe and c) 50MW-MNPs-Fe. The types of curves (I, II, III, IV) were assigned according to (1).



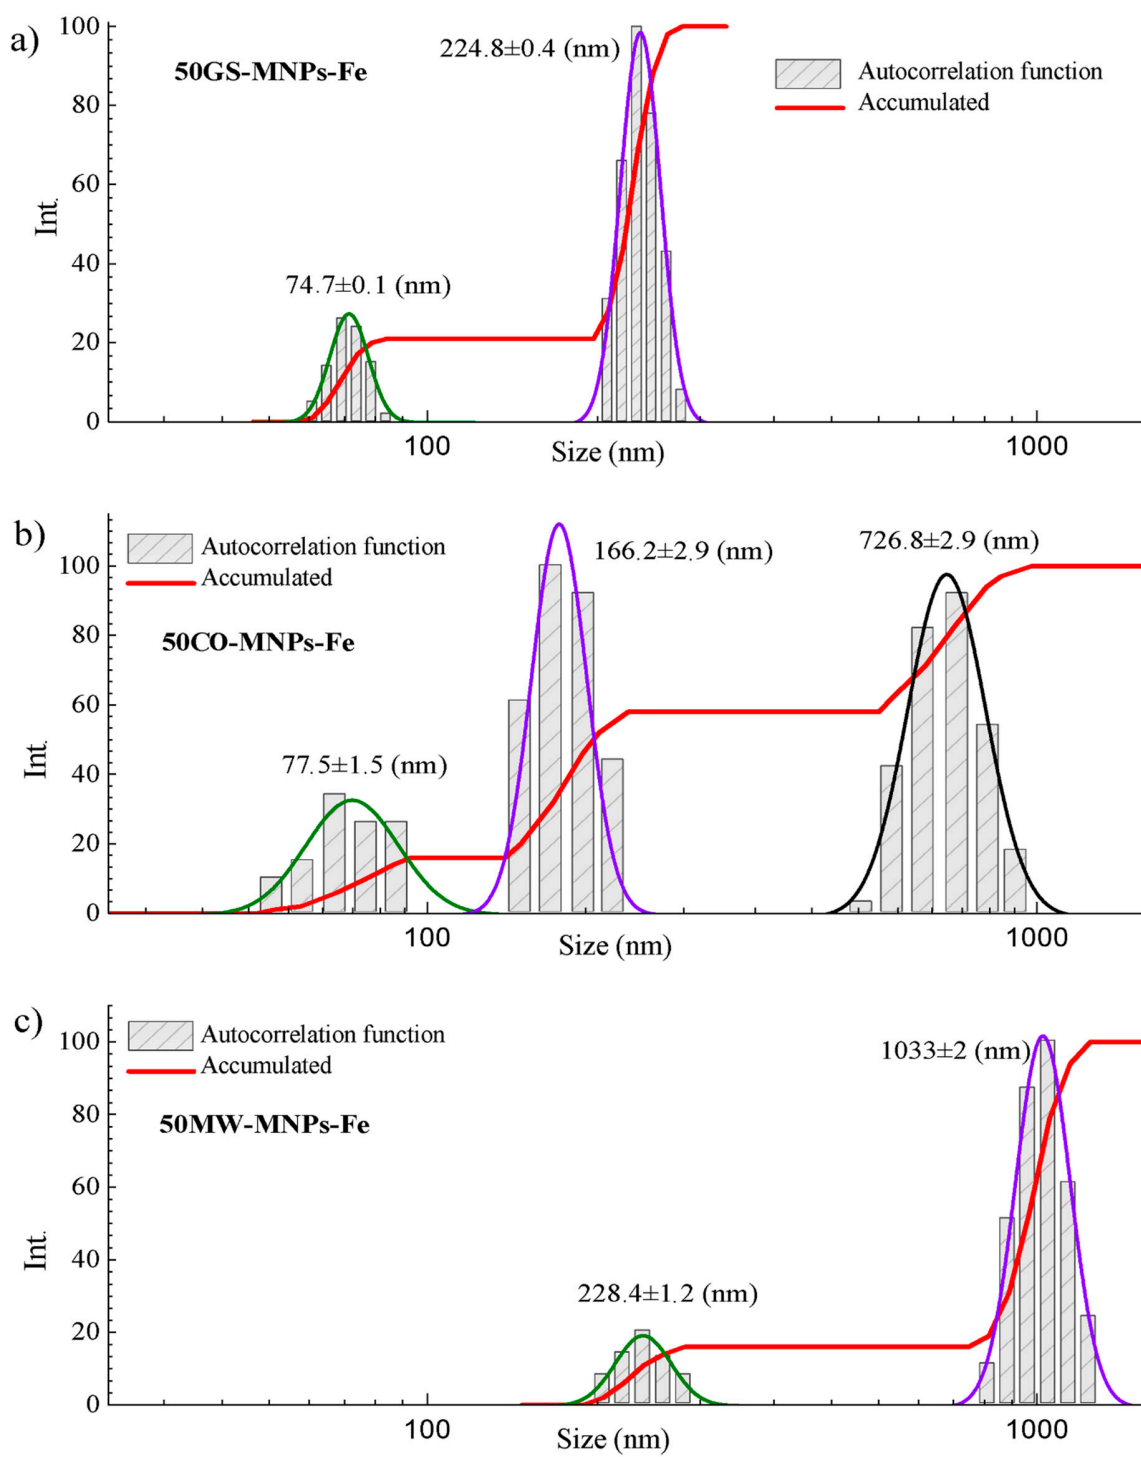

**Figure S7.** Size distribution of the MNPs-Fe corresponding to the samples; a) 50GS-MNPs-Fe, b) 50CO-MNPs-Fe and c) 50MW-MNPs-Fe.

Supplementary Tables

**Table S1.** Produced weight of MNPs-Fe obtained by GS, MW and CO

| Samples       | Average weight (mg) |
|---------------|---------------------|
| 0GS-MNPs-Fe   | 8.97 ± 2.32         |
| 10GS-MNPs-Fe  | 13.43 ± 5.26        |
| 25GS-MNPs-Fe  | 25.93 ± 6.23        |
| 50GS-MNPs-Fe  | 88.13 ± 13.33       |
| 75GS-MNPs-Fe  | 95.03 ± 9.85        |
| 100GS-MNPs-Fe | 84.20 ± 3.10        |
| 10CO-MNPs-Fe  | 79.63 ± 6.20        |
| 25CO-MNPs-Fe  | 79.73 ± 5.61        |
| 50CO-MNPs-Fe  | 72.33 ± 8.96        |
| 75CO-MNPs-Fe  | 68.67 ± 5.70        |
| 100CO-MNPs-Fe | 64.73 ± 8.90        |
| 10MW-MNPs-Fe  | 79.30 ± 3.87        |
| 25MW-MNPs-Fe  | 79.97 ± 6.85        |
| 50MW-MNPs-Fe  | 80.10 ± 4.61        |
| 75MW-MNPs-Fe  | 85.87 ± 5.56        |

**Table S2.** Average roughness, obtained from the AFM topographies, for the samples obtained by GS.

| Average roughness - Ra (pm) |             |              |              |              |               |
|-----------------------------|-------------|--------------|--------------|--------------|---------------|
| ID                          | 0GS-MNPs-Fe | 25GS-MNPs-Fe | 50GS-MNPs-Fe | 75GS-MNPs-Fe | 100GS-MNPs-Fe |
| 1                           | 153         | 186          | 122          | 139          | 81            |
| 2                           | 74          | 181          | 78           | 70           | 42            |
| 3                           | 118         | 105          | 61           | 116          | 69            |
| 4                           | 93          | 107          | 63           | 50           | 53            |
| 5                           | 110         | 66           | 90           | 56           | 59            |
| 6                           | 75          | 131          | 102          | 94           | 42            |
| 7                           | 73          | 119          | 51           | 61           | 62            |
| 8                           | 86          | 143          | 102          | 57           | 61            |
| 9                           | 117         | 183          | 71           | 51           | 46            |
| 10                          | 68          | 132          | 45           | 67           | 47            |
| 11                          | 62          | 113          | 96           | 71           | 50            |
| 12                          | 172         | 97           | 103          | 86           | 66            |
| 13                          | 105         | 115          | 66           | 84           | 48            |
| 14                          | 166         | 75           | 74           | 52           | 47            |
| 15                          | 78          | 85           | 64           | 63           | 63            |
| 16                          | 183         | 146          | 77           | 61           | 54            |
| 17                          | 86          | 117          | 54           | 92           | 69            |
| 18                          | 65          | 132          | 56           | 52           | 49            |
| 19                          | 101         | 108          | 72           | 65           | 74            |
| 20                          | 78          | 134          | 112          | 99           | 75            |
| <b>Average</b>              | 103         | 124          | 78           | 74           | 58            |
| <b>SD</b>                   | ±38         | ±33          | ±22          | ±24          | ±12           |

**Table S3a.** Active Raman bands of functional groups found in the Raman spectra of the 0GS-MNPs-Fe, 25GS-MNPs-Fe, 50GS-MNPs-Fe, 75GS-MNPs-Fe and 100CO-MNPs-Fe samples.

| Active Raman bands of functional groups (cm <sup>-1</sup> ) - HORIBA                                                          | Raman bands in samples (cm <sup>-1</sup> ) |                |                    |                |               |
|-------------------------------------------------------------------------------------------------------------------------------|--------------------------------------------|----------------|--------------------|----------------|---------------|
|                                                                                                                               | 0GS-MNPs-Fe                                | 25GS-MNPs-Fe   | 50GS-MNPs-Fe       | 75GS-MNPs-Fe   | 100CO-MNPs-Fe |
| 550-800, $\delta$ (C-Cl) (strong)                                                                                             | 564.6 (strong)                             | -              | -                  | -              | -             |
| 600-1300, $\nu$ (C-C) aliphatic (medium)<br>630-790, $\nu$ (C-S) aliphatic (strong)<br>800-970, $\nu$ (O-C-O) (medium)        | 628.4 (strong)                             | -              | -                  | -              | -             |
|                                                                                                                               | 645.7 (strong)                             | -              | 710 (strong)       | -              | -             |
|                                                                                                                               | 798.2 (medium)                             | -              | 854 (medium)       | -              | -             |
| 600-1300, $\nu$ (C-C) aliphatic (medium)<br>800-970, $\nu$ (O-C-O) (medium)<br>1000, $\nu$ (C-C) aromatic (medium)            | 952 (medium)                               | -              | 950-1,015 (medium) | 1,004 (weak)   | -             |
| 600-1300, $\nu$ (C-C) aliphatic (medium)<br>1080-1100, $\nu$ (C-S) aromatic (strong)                                          | 1,100 (strong)                             | -              | 1,131 (medium)     | -              | -             |
| 600-1300, $\nu$ (C-C) aliphatic (medium)<br>1060-1150, $\nu_{as}$ (C-O-C) (weak)<br>1000-1250, $\nu$ (C=S) (strong)           | 1,172 (strong)                             | 1,162 (weak)   | 1,165 (medium)     | 1,160 (weak)   | -             |
| 600-1300, $\nu$ (C-C) aliphatic (medium)<br>1000-1250, $\nu$ (C=S) (strong)                                                   | 1,274 (strong)                             | 1,307 (medium) | 1,300 (medium)     | 1,305 (media)  | -             |
| 1400-1470, $\delta_{as}$ (CH <sub>3</sub> ), $\delta$ (CH <sub>2</sub> ) (medium)<br>1450,1500, $\nu$ (C-C) aromatic (medium) | 1,486 (medium)                             | 1,479 (medium) | 1,486 (medium)     | 1,477 (medium) | -             |
| ~1600, $\delta$ (H <sub>2</sub> O) (weak wide)<br>1500-1900, $\nu$ (C=C) (strong)                                             | 1,604 (strong)                             | 1,598 (medium) | 1,591 (strong)     | 1,592 (medium) | 1,608 (weak)  |
| 1500-1900, $\nu$ (C=C) (strong)<br>1680-1820, $\nu$ (C=O) (medium)                                                            | 1676 (strong)                              | -              | 1696 (medium)      | -              | -             |
| 1500-1900, $\nu$ (C=C) (strong)<br>1680-1820, $\nu$ (C=O) (medium)                                                            | 1,808 (strong)                             | -              | 1,805 (medium)     | -              | -             |
| 1500-1900, $\nu$ (C=C) (strong)                                                                                               | 1,904 (strong)                             | -              | 1,905 (medium)     | -              | -             |
| Stretching symmetrical ( $\nu$ ), asymmetric ( $\nu_{as}$ ), symmetrical bending ( $\delta$ ), asymmetric ( $\delta_{as}$ )   |                                            |                |                    |                |               |



**Table S3b.** Active bands found in the samples OGS-MNPs-Fe, 25GS-MNPs-Fe, 50GS-MNPs-Fe, 75GS-MNPs-Fe and 100CO-MNPs-Fe by FT-IR

| FT-IR Bands, Functional Group                                                                                                                                                                                                                                                        | Bands obtained in the FT-IR spectra / sample |                   |                   |                   |                 |
|--------------------------------------------------------------------------------------------------------------------------------------------------------------------------------------------------------------------------------------------------------------------------------------|----------------------------------------------|-------------------|-------------------|-------------------|-----------------|
|                                                                                                                                                                                                                                                                                      | OGS-MNPs-Fe                                  | 25GS-MNPs-Fe      | 50GS-MNPs-Fe      | 75GS-MNPs-Fe      | 100CO-MNPs-Fe   |
| (3700-3584) $\nu$ (O-H), alcohols                                                                                                                                                                                                                                                    | 3,866<br>(weak)                              | 3,886<br>(weak)   | 3,800<br>(weak)   | ---               | ---             |
| (3700-3584) $\nu$ (O-H), alcohols                                                                                                                                                                                                                                                    | 3,662<br>(weak)                              | 3,706<br>(weak)   | 3,700<br>(weak)   | 3,690<br>(weak)   | 3,650<br>(weak) |
| (3000-2840), $\nu$ (C-H) alkanes (CH <sub>3</sub> )<br>(~2872), $\nu$ (C-H), (CH <sub>3</sub> )<br>(~2853), $\nu$ (C-H), (CH <sub>2</sub> )                                                                                                                                          | ---                                          | ---               | 2,856<br>(weak)   | 2,862<br>(weak)   | ---             |
| (2600-2550), $\nu$ (S-H), compounds S                                                                                                                                                                                                                                                | 2,576<br>(weak)                              | 2,586<br>(weak)   | 2,532<br>(medium) | ---               | ---             |
| (2700-2250), $\nu$ (N-H), amine salts                                                                                                                                                                                                                                                | 2,336<br>(weak)                              | 2,334<br>(weak)   | 2,350<br>(medium) | 2,348<br>(weak)   | 2,354<br>(weak) |
| (2000-1900), $\nu$ (C=C), alkenes<br>(1870-1540), $\nu$ (C=O) ketones<br>(~ 1640), $\delta$ (H <sub>2</sub> O)                                                                                                                                                                       | 1,960<br>(weak)                              | 1,932<br>(weak)   | 1,886<br>(medium) | ---               | 1,776<br>(weak) |
| (1670-1600), $\nu$ (C=C), (lineal, cíclicos)<br>(1600-1585), $\delta$ (C-C), (aromatic)<br>(1870-1540), $\nu$ (C=O), ketones<br>(1710-1685), $\nu$ (C=O), aldehydes<br>(~ 1640), $\delta$ (H <sub>2</sub> O)                                                                         | 1,698<br>(medium)                            | 1,580<br>(medium) | 1,600<br>(medium) | 1,638<br>(weak)   | ---             |
| (1350-1150), $\omega$ , $\tau$ (C-H), (CH <sub>2</sub> )<br>(1300-1000), $\delta$ (C-H), (aromatic)<br>(1260-1000), $\nu$ (C-O), alcohols<br>(1300-1000), $\nu$ (C-C-C), $\delta$ (C-C(=O)), ketones<br>(1070-1030), $\nu$ (S=O), compounds S<br>(1096-1089), $\nu$ (C-Cl), halogens | 1,180<br>(medium)                            | 1,156<br>(medium) | 1,120<br>(medium) | 1,158<br>(medium) | ---             |
| (850-550), $\nu$ (C-Cl), halogens<br>(~850), $\omega$ (=CH <sub>2</sub> ), alkenes<br>(900-675), $\delta$ (C-H), aromatic                                                                                                                                                            | 870<br>(medium)                              | 868<br>(medium)   | 822<br>(medium)   | 828<br>(medium)   | ---             |
| (850-550), $\nu$ (C-Cl), halógens<br>(700-450), $\nu$ (Fe-O)                                                                                                                                                                                                                         | 578                                          | 546               | 640               | 578               | ---             |
| (700-450), $\nu$ (Fe-O)                                                                                                                                                                                                                                                              | 508                                          | 502               | 536               | 520               | 550             |
| Stretching symmetrical ( $\nu$ ), asymmetrical ( $\nu_{as}$ ), symmetrical bending ( $\delta$ ), asymmetrical ( $\delta_{as}$ ), Scissoring ( $\delta_s$ ), Rocking ( $\rho$ ), Wagging ( $\omega$ ), Twisting ( $\tau$ ).                                                           |                                              |                   |                   |                   |                 |

**Table S4.** Parameters of crystalline structures obtained from XRD.

| Samples       | FWHW | 2 $\theta$ | D <sub>c</sub> | a (Å)    | Iron oxide       | Space Group                                                                                    | COD ID             |
|---------------|------|------------|----------------|----------|------------------|------------------------------------------------------------------------------------------------|--------------------|
| 0GS-MNPs-Fe   | 0.24 | 35.09      | 34.64          | 8.474954 | 35.3% Magnetite  | Fd-3m – cubic                                                                                  | 1011032            |
|               | ---  | ---        | ---            | ---      | 64.70% Hematite  | R-3c – trigonal-hexagonal                                                                      | 9000139            |
| 25GS-MNPs-Fe  | 0.25 | 35.08      | 32.40          | 8.478080 | 39.5% Magnetite  | Fd-3m – cubic                                                                                  | 10100369           |
|               | ---  | ---        | ---            | ---      | 53.0 % Maghemite | 4 <sub>3</sub> 2 <sub>1</sub> 2 – tetragonal                                                   | 9006318            |
|               | ---  | ---        | ---            | ---      | 7.5% Hematite    | C2/c – monoclinic                                                                              | 2108027            |
| 50GS-MNPs-Fe  | 0.75 | 35.38      | 10.97          | 8.406839 | 47.0% Magnetite  | Fd-3m – cubic                                                                                  | 1011032            |
|               | ---  | ---        | ---            | ---      | 53.0% Maghemite  | Fd-3m – cubic                                                                                  | 9006316            |
| 75GS-MNPs-Fe  | 0.47 | 35.37      | 17.43          | 8.405744 | 47.0% Magnetite  | Fd-3m – cubic                                                                                  | 1011032            |
|               | ---  | ---        | ---            | ---      | 53.0% Maghemite  | P 4 <sub>1</sub> 32 – cubic                                                                    | 9006317            |
| 100GS-MNPs-Fe | 0.87 | 35.74      | 9.53           | 8.331638 | 6.6% Magnetite   | Fd-3m – cubic                                                                                  | 1011084            |
|               | ---  | ---        | ---            | ---      | 94.3% Maghemite  | P4 <sub>3</sub> 2 <sub>1</sub> 2 – tetragonal<br>P4 <sub>1</sub> 2 <sub>1</sub> 2 – tetragonal | 9006318<br>1528612 |
| 25CO-MNPs-Fe  | 1.18 | 35.39      | 6.97           | 8.405071 | 88.0% Magnetite  | Fd-3m – cubic                                                                                  | 7228110            |
|               | ---  | ---        | ---            | ---      | 12.0% Maghemite  | P4 <sub>3</sub> 2 <sub>1</sub> 2 – tetragonal                                                  | 9006318            |
| 50CO-MNPs-Fe  | 1.41 | 35.35      | 5.87           | 8.415581 | 63.5% Magnetite  | Fd-3m (227) – cubic                                                                            | 9002319            |
|               | ---  | ---        | ---            | ---      | 36.5% Maghemite  | P4 <sub>1</sub> 32 – cubic                                                                     | 9006317            |
| 75CO-MNPs-Fe  | 1.72 | 35.24      | 4.78           | 8,440935 | 8.9% Magnetite   | Fd-3m – cubic                                                                                  | 1011032            |
|               | ---  | ---        | ---            | ---      | 91.1% Maghemite  | P4 <sub>3</sub> 2 <sub>1</sub> 2 – tetragonal                                                  | 9006318            |
| 100CO-MNPs-Fe | 1.03 | 35.41      | 7.99           | 8.400700 | 98.0% Magnetite  | Fd-3m – cubic                                                                                  | 9002320<br>1011084 |
|               | ---  | ---        | ---            | ---      | 2.0% Maghemite   | P4 <sub>3</sub> 2 <sub>1</sub> 2 – tetragonal                                                  | 9006318            |
| 25MW-MNPs-Fe  | 0.70 | 35.33      | 11.71          | 8.420069 | 34,1% Magnetite  | Fd-3m – cubic                                                                                  | 7228110            |
|               | ---  | ---        | ---            | ---      | 65.9% Maghemite  | P4 <sub>1</sub> 2 <sub>1</sub> 2 – tetragonal                                                  | 1528612            |
| 50MW-MNPs-Fe  | 0.80 | 35.25      | 10.24          | 8.436802 | 91.2% Magnetite  | Fd-3m – cubic                                                                                  | 9005842            |
|               | ---  | ---        | ---            | ---      | 8.8% Maghemite   | P4 <sub>1</sub> 32 – cubic                                                                     | 1528612            |
| 75MW-MNPs-Fe  | 1.06 | 35.33      | 7.74           | 8.418517 | 10.0% Magnetite  | Fd-3m – cubic                                                                                  | 9005814            |
|               | ---  | ---        | ---            | ---      | 90.0% Maghemite  | P4 <sub>1</sub> 2 <sub>1</sub> 2 – tetragonal<br>P4 <sub>3</sub> 2 <sub>1</sub> 2 – tetragonal | 1528612<br>9012692 |

**Table S5a.** Log<sub>10</sub> (CFU) count of antibacterial PTT assay groups for *S. aureus* and *E. coli*.

| <i>S. aureus</i>                   |                  |                          |                                 |                                         |                                 |                                         |                                 |                                         |
|------------------------------------|------------------|--------------------------|---------------------------------|-----------------------------------------|---------------------------------|-----------------------------------------|---------------------------------|-----------------------------------------|
| Class # (Tukey Test)               | 1                | 2                        | 3                               | 4                                       | 5                               | 6                                       | 7                               | 9                                       |
| Colony Forming Units               | <i>S. aureus</i> | <i>S. aureus</i> + Light | <i>S. aureus</i> + 50GS-MNPs-Fe | <i>S. aureus</i> + 50GS-MNPs-Fe + Light | <i>S. aureus</i> + 50CO-MNPs-Fe | <i>S. aureus</i> + 50CO-MNPs-Fe + Light | <i>S. aureus</i> + 50MW-MNPs-Fe | <i>S. aureus</i> + 50MW-MNPs-Fe + Light |
| Log <sub>10</sub> (CFU/mL)         | 5.142            | 5.204                    | 4.931                           | 0.000                                   | 5.069                           | 0.000                                   | 5.107                           | 0.000                                   |
| Log <sub>10</sub> (CFU/mL)         | 5.089            | 5.158                    | 4.873                           | 0.000                                   | 5.158                           | 0.000                                   | 5.069                           | 3.301                                   |
| Log <sub>10</sub> (CFU/mL)         | 5.049            | 5.174                    | 4.727                           | 0.000                                   | 5.125                           | 0.000                                   | 5.049                           | 0.000                                   |
| Average Log <sub>10</sub> (CFU/mL) | 5.093            | 5.179                    | 4.844                           | 0.000                                   | 5.118                           | 0.000                                   | 5.075                           | 1.100                                   |
| Desv. St.                          | 0.047            | 0.023                    | 0.105                           | 0.000                                   | 0.045                           | 0.000                                   | 0.029                           | 1.906                                   |
| <i>E. coli</i>                     |                  |                          |                                 |                                         |                                 |                                         |                                 |                                         |
| Class # (Tukey Test)               | 1                | 2                        | 3                               | 4                                       | 5                               | 6                                       | 7                               | 9                                       |
| Colony Forming Units               | <i>E. coli</i>   | <i>E. coli</i> + Light   | <i>E. coli</i> + 50GS-MNPs-Fe   | <i>E. coli</i> + 50GS-MNPs-Fe + Light   | <i>E. coli</i> + 50CO-MNPs-Fe   | <i>E. coli</i> + 50CO-MNPs-Fe + Light   | <i>E. coli</i> + 50MW-MNPs-Fe   | <i>E. coli</i> + 50MW-MNPs-Fe + Light   |
| Log <sub>10</sub> (CFU/mL)         | 5.0280           | 5.2041                   | 5.3802                          | 4.1072                                  | 5.1249                          | 0.0000                                  | 4.9823                          | 0.0000                                  |
| Log <sub>10</sub> (CFU/mL)         | 5.1742           | 5.2711                   | 5.3705                          | 3.4472                                  | 5.1072                          | 0.0000                                  | 5.0887                          | 0.0000                                  |
| Log <sub>10</sub> (CFU/mL)         | 4.9574           | 5.1742                   | 5.4346                          | 0.0000                                  | 5.2041                          | 2.6021                                  | 5.2585                          | 0.0000                                  |
| Average Log <sub>10</sub> (CFU/mL) | 5.0532           | 5.2164                   | 5.3951                          | 2.5181                                  | 5.1454                          | 0.8674                                  | 5.1098                          | 0.0000                                  |
| Desv. St.                          | 0.1105           | 0.0496                   | 0.0345                          | 2.2056                                  | 0.0516                          | 1.5023                                  | 0.1393                          | 0.0000                                  |

**Table S5b.** Means Comparisons for *S. aureus*.

| Tukey Test - <i>S. aureus</i> groups |            |         |          |            |       |     |
|--------------------------------------|------------|---------|----------|------------|-------|-----|
| Class #                              | Mean Diff. | SEM     | q value  | Prob.      | Alpha | Sig |
| Class2 Class1                        | 0.08557    | 0.55143 | 0.21947  | 1          | 0.001 | 0   |
| Class3 Class1                        | -0.24956   | 0.55143 | 0.64002  | 0.99974    | 0.001 | 0   |
| Class3 Class2                        | -0.33513   | 0.55143 | 0.85949  | 0.99823    | 0.001 | 0   |
| Class4 Class1                        | -5.09331   | 0.55143 | 13.0624  | 1.77889E-6 | 0.001 | 1   |
| Class4 Class2                        | -5.17888   | 0.55143 | 13.28187 | 1.40295E-6 | 0.001 | 1   |
| Class4 Class3                        | -4.84375   | 0.55143 | 12.42238 | 3.5664E-6  | 0.001 | 1   |
| Class5 Class1                        | 0.02427    | 0.55143 | 0.06224  | 1          | 0.001 | 0   |
| Class5 Class2                        | -0.06131   | 0.55143 | 0.15723  | 1          | 0.001 | 0   |
| Class5 Class3                        | 0.027383   | 0.55143 | 0.70226  | 0.99951    | 0.001 | 0   |
| Class5 Class4                        | 5.11757    | 0.55143 | 13.12464 | 1.66305E-6 | 0.001 | 1   |
| Class6 Class1                        | -5.09331   | 0.55143 | 13.0624  | 1.77889E-6 | 0.001 | 1   |
| Class6 Class2                        | -5.17888   | 0.55143 | 13.28187 | 1.40295E-6 | 0.001 | 1   |
| Class6 Class3                        | -4.84375   | 0.55143 | 12.42238 | 3.5664E-6  | 0.001 | 1   |
| Class6 Class4                        | 0          | 0.55143 | 0        | 1          | 0.001 | 0   |
| Class6 Class5                        | -5.11757   | 0.55143 | 13.12464 | 1.66305E-6 | 0.001 | 1   |
| Class7 Class1                        | -0.01802   | 0.55143 | 0.04622  | 1          | 0.001 | 0   |
| Class7 Class2                        | -0.1036    | 0.55143 | 0.26569  | 1          | 0.001 | 0   |
| Class7 Class3                        | 0.23154    | 0.55143 | 0.5938   | 0.99984    | 0.001 | 0   |
| Class7 Class4                        | 5.07528    | 0.55143 | 13.01618 | 1.87014E-6 | 0.001 | 1   |
| Class7 Class5                        | -0.04229   | 0.55143 | 0.10846  | 1          | 0.001 | 0   |
| Class7 Class6                        | 5.07528    | 0.55143 | 13.01618 | 1.87014E-6 | 0.001 | 1   |
| Class8 Class1                        | -3.99296   | 0.55143 | 10.24044 | 4.30556E-5 | 0.001 | 1   |
| Class8 Class2                        | -4.07854   | 0.55143 | 10.4599  | 3.31411E-5 | 0.001 | 1   |
| Class8 Class3                        | -3.7434    | 0.55143 | 9.60042  | 9.38762E-5 | 0.001 | 1   |
| Class8 Class4                        | 1.10034    | 0.55143 | 282196   | 0.51335    | 0.001 | 0   |
| Class8 Class5                        | -4.01723   | 0.55143 | 10.30268 | 3.99643E-5 | 0.001 | 1   |
| Class8 Class6                        | 1.10034    | 0.55143 | 2.82196  | 0.51335    | 0.001 | 0   |
| Class8 Class7                        | -3.97494   | 0.55143 | 10.19422 | 4.55116E-5 | 0.001 | 1   |

Sig. equals 1 indicates that the difference of the means is significant at the 0.001 level.

Sig. equals 0 indicates that the difference of the means is not significant at the 0.001 level.



**Table S5c.** Means Comparisons for *E. coli*.

| Tukey Test - <i>E. coli</i> groups |            |         |         |            |       |     |
|------------------------------------|------------|---------|---------|------------|-------|-----|
| Class #                            | Mean Diff. | SEM     | q value | Prob.      | Alpha | Sig |
| Class2 Class1                      | 0.16324    | 0.77241 | 0.29887 | 1          | 0.001 | 0   |
| Class3 Class1                      | 0.34187    | 0.77241 | 0.62592 | 0.99974    | 0.001 | 0   |
| Class3 Class2                      | 0.17863    | 0.77241 | 0.32705 | 1          | 0.001 | 0   |
| Class4 Class1                      | -2.53509   | 0.77241 | 4.6415  | 0.06981    | 0.001 | 0   |
| Class4 Class2                      | -2.69833   | 0.77241 | 4.94037 | 0.04716    | 0.001 | 0   |
| Class4 Class3                      | -2.87695   | 0.77241 | 5.26742 | 0.03041    | 0.001 | 0   |
| Class5 Class1                      | 0.09221    | 0.77241 | 0.16883 | 1          | 0.001 | 0   |
| Class5 Class2                      | -0.07102   | 0.77241 | 0.13004 | 1          | 0.001 | 0   |
| Class5 Class3                      | -0.24965   | 0.77241 | 0.45709 | 0.99995    | 0.001 | 0   |
| Class5 Class4                      | 2.6273     | 0.77241 | 4.81033 | 0.056      | 0.001 | 0   |
| Class6 Class1                      | -4.18586   | 0.77241 | 7.6639  | 0.00115    | 0.001 | 0   |
| Class6 Class2                      | -4.34909   | 0.77241 | 7.96277 | 7.68451E-4 | 0.001 | 1   |
| Class6 Class3                      | -4.52772   | 0.77241 | 8.28982 | 4.98996E-4 | 0.001 | 1   |
| Class6 Class4                      | -1.65077   | 0.77241 | 3.0224  | 0.43366    | 0.001 | 0   |
| Class6 Class5                      | -4.27807   | 0.77241 | 7.83273 | 9.13727E-4 | 0.001 | 1   |
| Class7 Class1                      | 0.05661    | 0.77241 | 0.10365 | 1          | 0.001 | 0   |
| Class7 Class2                      | -0.10662   | 0.77241 | 0.19522 | 1          | 0.001 | 0   |
| Class7 Class3                      | -0.28525   | 0.77241 | 0.52227 | 0.99993    | 0.001 | 0   |
| Class7 Class4                      | 2.5917     | 0.77241 | 4.74515 | 0.061      | 0.001 | 0   |
| Class7 Class5                      | -0.0356    | 0.77241 | 0.06518 | 1          | 0.001 | 0   |
| Class7 Class6                      | 4.24247    | 0.77241 | 7.76755 | 9.96869E-4 | 0.001 | 1   |
| Class8 Class1                      | -5.05321   | 0.77241 | 9.25194 | 1.44916E-4 | 0.001 | 1   |
| Class8 Class2                      | -5.21645   | 0.77241 | 9.55081 | 9.98233E-5 | 0.001 | 1   |
| Class8 Class3                      | -5.39508   | 0.77241 | 9.87786 | 6.67556E-5 | 0.001 | 1   |
| Class8 Class4                      | -2.51812   | 0.77241 | 4.61044 | 0.07267    | 0.001 | 0   |
| Class8 Class5                      | -5.14542   | 0.77241 | 9.42077 | 1.17342E-4 | 0.001 | 1   |
| Class8 Class6                      | -0.86735   | 0.77241 | 1.58804 | 0.94207    | 0.001 | 0   |
| Class8 Class7                      | -5.10983   | 0.77241 | 9.35559 | 1.27262E-4 | 0.001 | 1   |

Sig. equals 1 indicates that the difference of the means is significant at the 0.001 level.

Sig. equals 0 indicates that the difference of the means is not significant at the 0.001 level.

**Table S6a.** Log (inhibitor) vs. response - Variable slope (four parameters) - 24 h, with animal cell line ATCC RAW 264.7.

| <b>Log(inhibitor) vs. response - Variable slope (four parameters)</b> |                     |                  |                  |
|-----------------------------------------------------------------------|---------------------|------------------|------------------|
| Best-fit values                                                       | 50GS-MNPs-Fe        | 50CO-MNPs-Fe     | 50MW-MNPs-Fe     |
| Bottom                                                                | 54.11               | 57.2             | 33.77            |
| Top                                                                   | 97.3                | 96.63            | 99.82            |
| LogIC50                                                               | 2.503               | 2.779            | 3.105            |
| HillSlope                                                             | -3.972              | -2.644           | -1.794           |
| IC50                                                                  | 318.2               | 601.6            | 1274             |
| Span                                                                  | 43.2                | 39.43            | 66.05            |
| 95% CI (profile likelihood)                                           | 50GS-MNPs-Fe        | 50CO-MNPs-Fe     | 50MW-MNPs-Fe     |
| Bottom                                                                | 47.62 to 59.31      | 42.14 to 63.49   | -323.6 to 51.33  |
| Top                                                                   | 94.26 to 100,7      | 94.48 to 98.93   | 98.14 to 101.6   |
| LogIC50                                                               | 2.412 to 2.593      | 2.675 to 2.982   | 2.933 to 4.134   |
| HillSlope                                                             | -infinity to -1.787 | -6.820 to -1.397 | -2.665 to -1.057 |
| IC50                                                                  | 258.3 to 391.4      | 473.2 to 958.5   | 857.0 to 13619   |
| Goodness of Fit                                                       | 50GS-MNPs-Fe        | 50CO-MNPs-Fe     | 50MW-MNPs-Fe     |
| Degrees of Freedom                                                    | 26                  | 26               | 26               |
| R squared                                                             | 0.9152              | 0.9189           | 0.9558           |
| Sum of Squares                                                        | 933.4               | 494.4            | 295              |
| Sy.x                                                                  | 5.992               | 4.361            | 3.368            |
| Number of points                                                      | 50GS-MNPs-Fe        | 50CO-MNPs-Fe     | 50MW-MNPs-Fe     |
| # X values                                                            | 30                  | 30               | 30               |
| # Y values                                                            | 30                  | 30               | 30               |

**Table S6b.** Log (inhibitor) vs. response - Variable slope (four parameters) – 8 days, with animal cell line ATCC RAW 264.7.

| <b>Log(inhibitor) vs. response -- Variable slope (four parameters)</b> |                  |                    |                  |
|------------------------------------------------------------------------|------------------|--------------------|------------------|
| Best-fit values                                                        | 50MW-MNPs-Fe     | 50CO-MNPs-Fe       | 50GS-MNPs-Fe     |
| Bottom                                                                 | 23.41            | 20.33              | 28.95            |
| Top                                                                    | 97.23            | 100.2              | 100.1            |
| LogIC50                                                                | 2.338            | 2.716              | 2.664            |
| HillSlope                                                              | -1.847           | -0.8897            | -2.407           |
| IC50                                                                   | 217.7            | 520.2              | 461.4            |
| Span                                                                   | 73.82            | 79.91              | 71.13            |
| 95% CI (profile likelihood)                                            | 50MW-MNPs-Fe     | 50CO-MNPs-Fe       | 50GS-MNPs-Fe     |
| Bottom                                                                 | 13.39 to 30.56   | to 45.55           | 14.48 to 37.46   |
| Top                                                                    | 93.04 to 101.8   | 92.63 to +infinity | 96.69 to 103.6   |
| LogIC50                                                                | 2.231 to 2.460   | 2.305              | 2.572 to 2.794   |
| HillSlope                                                              | -2.638 to -1.273 | -2.009 to 0.1726   | -3.912 to -1.537 |
| IC50                                                                   | 170.4 to 288.6   | 201.9              | 373.5 to 621.8   |
| Goodness of Fit                                                        | 50MW-MNPs-Fe     | 50CO-MNPs-Fe       | 50GS-MNPs-Fe     |
| Degrees of Freedom                                                     | 26               | 26                 | 26               |
| R squared                                                              | 0.9542           | 0.8633             | 0.948            |
| Sum of Squares                                                         | 1222             | 2058               | 1117             |
| Sy.x                                                                   | 6.855            | 8.898              | 6.555            |
| Number of points                                                       | 50MW-MNPs-Fe     | 50CO-MNPs-Fe       | 50GS-MNPs-Fe     |
| # X values                                                             | 30               | 30                 | 30               |
| # Y values                                                             | 30               | 30                 | 30               |

References:

1. Sharma SK. Complex magnetic nanostructures: Synthesis, assembly and applications. Complex Magnetic Nanostructures: Synthesis, Assembly and Applications. 2017. 1–464 p.
